# Supplementary material for: Sex-specific transitions of frailty states and modifiable determinants in community-dwelling older adults: a 16-year Chinese nationwide cohort study
Source: Research Square preprint supplement (doi:10.21203/rs.3.rs-8353056/v1), 2026-01-13
Supplement: Supplementary file 1 [file 1dcdbc61ddea089885ffb0af.pdf]

## **Supplementary appendix**

### **Sex-specific transitions of frailty states and modifiable determinants in community-dwelling older adults: a nationwide Chinese cohort**

**Contents list of supplementary material: CLICK on any item to jump to it.**

#### **Supplementary Tables**

|                                                                                                                                                           |          |
|-----------------------------------------------------------------------------------------------------------------------------------------------------------|----------|
| <b>eTable 1 Items included in the frailty index .....</b>                                                                                                 | <b>4</b> |
| <b>eTable 2 Observed numbers of frailty states transition from one follow-up to next<br/>follow-up .....</b>                                              | <b>6</b> |
| <b>eTable 3 Possible transition states of frailty and corresponding transition probabilities<br/>at 1-6, 9, 12, and 16 years, stratified by sex .....</b> | <b>7</b> |
| <b>eTable 4 Effects of covariates on transitions among frailty states .....</b>                                                                           | <b>8</b> |

## **Supplementary appendix**

**Contents list of supplementary material: CLICK on any item to jump to it.**

**Supplementary Figures**

**eFigure 1 Flowchart of participants selection..... 9**

**eFigure 2 Multi-state Markov model..... 10**

**Supplementary appendix**

## Supplementary Appendices

|                                      |           |
|--------------------------------------|-----------|
| <b>1 eAppendix 1:</b>                | <b>11</b> |
| <b>1.1 Assessment of covariate:</b>  | <b>11</b> |
| <b>1.2 Multi-state Markov model:</b> | <b>12</b> |

**eTable 1 Items included in the frailty index**

| Type of deficit                                | No. | Variables                                    | Cut-off points                                                                       |
|------------------------------------------------|-----|----------------------------------------------|--------------------------------------------------------------------------------------|
| <b>Mental health</b>                           | 1   | Look on the bright side of things            | Always=0; often=0.25; sometimes=0.5; seldom=0.75; never=1                            |
|                                                | 2   | Keep my belongings neat and clean            | Always=0; often=0.25; sometimes=0.5; seldom=0.75; never=1                            |
|                                                | 3   | Make own decisions                           | Always=0; often=0.25; sometimes=0.5; seldom=0.75; never=1                            |
|                                                | 4   | Feel fearful or anxious                      | Always=1; often=0.75; sometimes=0.5; seldom=0.25; never=0                            |
|                                                | 5   | Feel useless because of age                  | Always=1; often=0.75; sometimes=0.5; seldom=0.25; never=0                            |
| <b>Activities of daily living</b>              | 6   | Bathing                                      | Without assistance=0; need some assistance=0.5; unable to do so without assistance=1 |
|                                                | 7   | Dressing                                     | Without assistance=0; need some assistance=0.5; unable to do so without assistance=1 |
|                                                | 8   | Use of toilet                                | Without assistance=0; need some assistance=0.5; unable to do so without assistance=1 |
|                                                | 9   | Indoor transferring                          | Without assistance=0; need some assistance=0.5; unable to do so without assistance=1 |
|                                                | 10  | Continence                                   | Without assistance=0; need some assistance=0.5; unable to do so without assistance=1 |
|                                                | 11  | Eating                                       | Without assistance=0; need some assistance=0.5; unable to do so without assistance=1 |
| <b>Instrumental activities of daily living</b> | 12  | Visiting neighbors by oneself                | Yes=0; need some assistance=0.5; unable to do so=1                                   |
|                                                | 13  | Shopping by oneself if necessary             | Yes=0; need some assistance=0.5; unable to do so=1                                   |
|                                                | 14  | Cooking                                      | Yes=0; need some assistance=0.5; unable to do so=1                                   |
|                                                | 15  | Washing clothes                              | Yes=0; need some assistance=0.5; unable to do so=1                                   |
|                                                | 16  | Walking 1 km                                 | Yes=0; need some assistance=0.5; unable to do so=1                                   |
|                                                | 17  | Lift a weight of 5 kg                        | Yes=0; need some assistance=0.5; unable to do so=1                                   |
|                                                | 18  | Continuously crouch and stand up three times | Yes=0; need some assistance=0.5; unable to do so=1                                   |
| <b>Physical functional</b>                     | 19  | Use public transportation                    | Yes=0; need some assistance=0.5; unable to do so=1                                   |
|                                                | 20  | Able to use chopsticks to eat                | yes=0; no=1                                                                          |
|                                                | 21  | Hand behind neck                             | Right hand=0.5; left hand=0.5; both hands=0; neither hand=1                          |
|                                                | 22  | Hand behind lower back                       | Right hand=0.5; left hand=0.5; both hands=0; neither hand=1                          |

|                                             |    |                                                    |                                                                                                                           |
|---------------------------------------------|----|----------------------------------------------------|---------------------------------------------------------------------------------------------------------------------------|
| <b>limitations</b>                          | 23 | Able to raise arm upright                          | Right hand=0.5; left hand=0.5; both hands=0; neither hand=1                                                               |
|                                             | 24 | Able to stand up from sitting                      | Yes =0; need some assistance=0.5; unable to do so =1                                                                      |
|                                             | 25 | Able to pick up a book from the floor              | Yes =0; need some assistance=0.5; unable to do so =1                                                                      |
| <b>Sensory functioning</b>                  | 26 | Visual function                                    | Can see=0; can see but not distinguish the break in the circle=0.5; cannot see=1; blind=1                                 |
|                                             | 27 | Hearing ability                                    | Can hear without a hearing aid=0; can hear with a hearing aid=0.33; partly deaf, despite using a hearing aid=0.67; deaf=1 |
| <b>Cognitive function</b>                   | 28 | China-Modified Mini-Mental State Examination score | severe impairment (0-17) =1, mild impairment (18-23) =0.5, normal (24-30) =0                                              |
|                                             | 29 | Hypertension                                       | Yes=1; no=0                                                                                                               |
|                                             | 30 | Diabetes                                           | Yes=1; no=0                                                                                                               |
|                                             | 31 | Heart disease                                      | Yes=1; no=0                                                                                                               |
|                                             | 32 | Stroke or cerebrovascular disease                  | Yes=1; no=0                                                                                                               |
| <b>Chronic disease</b>                      | 33 | Bronchitis, emphysema, pneumonia, asthma           | Yes=1; no=0                                                                                                               |
|                                             | 34 | Tuberculosis                                       | Yes=1; no=0                                                                                                               |
|                                             | 35 | Cancer                                             | Yes=1; no=0                                                                                                               |
|                                             | 36 | Gastric or duodenal ulcer                          | Yes=1; no=0                                                                                                               |
|                                             | 37 | Parkinson's disease                                | Yes=1; no=0                                                                                                               |
|                                             | 38 | Bedsore                                            | Yes=1; no=0                                                                                                               |
| <b>Subjective and objective functioning</b> | 39 | Self-reported health                               | Very good=0; good=0.25; fair=0.5; bad=0.75; very bad=1                                                                    |
|                                             | 40 | Interviewer rated-health                           | Surprisingly healthy=0; relatively healthy=0.33; moderately unhealthy=0.67; very unhealthy=1                              |

## Reference

1. Gu D, Dupre ME, Sautter J, Zhu H, Liu Y, Yi Z. Frailty and mortality among Chinese at advanced ages. *J Gerontol B Psychol Sci Soc Sci.* 2009 Mar;64(2):279-89.
2. Bennett S, Song X, Mitnitski A, Rockwood K. A limit to frailty in very old, community-dwelling people: a secondary analysis of the Chinese longitudinal health and longevity study. *Age Ageing.* 2013 May;42(3):372-7.

**eTable 2 Observed numbers of frailty states transition from one follow-up to next follow-up**

| Sex   | Pre-transition, n (%) | Post-transition, n (%) |              |             |              |            |
|-------|-----------------------|------------------------|--------------|-------------|--------------|------------|
|       |                       | Robust                 | Pre-frail    | Frail       | Death        | Total      |
| Men   | Robust                | 2361 (48.17)           | 1216 (24.81) | 341 (6.96)  | 983 (20.06)  | 4910 (100) |
|       | Pre-frail             | 549 (15.44)            | 945 (26.58)  | 608 (17.10) | 1453 (40.87) | 3555 (100) |
|       | Frail                 | 19 (2.19)              | 65 (7.49)    | 174 (20.05) | 610 (70.28)  | 610 (100)  |
| Women | Robust                | 1444 (42.62)           | 1146 (33.83) | 301 (8.88)  | 497 (14.67)  | 3388 (100) |
|       | Pre-frail             | 609 (13.00)            | 1471 (31.41) | 986 (21.05) | 1617 (34.53) | 4683 (100) |
|       | Frail                 | 18 (1.46)              | 119 (9.64)   | 303 (24.52) | 795 (64.37)  | 1235 (100) |

**eTable 3 Possible transition states of frailty and corresponding transition probabilities at 1-6, 9, 12, and 16 years, stratified by sex**

| Sex   | States transition    | Transition probabilities (%) |      |      |      |      |      |      |      |      |
|-------|----------------------|------------------------------|------|------|------|------|------|------|------|------|
|       |                      | Time (years)                 |      |      |      |      |      |      |      |      |
|       |                      | 1                            | 2    | 3    | 4    | 5    | 6    | 9    | 12   | 16   |
| Men   | Maintain robustness  | 76.3                         | 59.9 | 48   | 39.1 | 32.2 | 26.8 | 15.8 | 9.5  | 4.9  |
| Men   | Maintain pre-frailty | 59.5                         | 38.1 | 26.2 | 19.2 | 14.8 | 11.7 | 6.6  | 3.9  | 2    |
| Men   | Maintain frailty     | 61.8                         | 39.1 | 25.4 | 16.9 | 11.5 | 7.9  | 3    | 1.4  | 0.6  |
| Men   | Robust → pre-frail   | 15.2                         | 20.8 | 21.8 | 20.8 | 18.9 | 16.7 | 10.9 | 6.9  | 3.6  |
| Men   | Pre-frail → frail    | 12                           | 14.7 | 13.9 | 12   | 9.9  | 8.1  | 4.4  | 2.5  | 1.2  |
| Men   | Pre-frail → robust   | 11.3                         | 15.4 | 16.2 | 15.4 | 14   | 12.4 | 8.1  | 5.1  | 2.7  |
| Men   | Frail → pre-frail    | 8.2                          | 10.1 | 9.5  | 8.2  | 6.8  | 5.6  | 3    | 1.7  | 0.8  |
| Men   | Robust → deceased    | 7                            | 15.5 | 24.2 | 33.2 | 41.5 | 49.2 | 67.6 | 79.7 | 89.3 |
| Men   | Pre-frail → deceased | 17.2                         | 31.7 | 43.7 | 53.4 | 61.3 | 67.7 | 80.9 | 88.5 | 94.1 |
| Men   | Frail → deceased     | 29.3                         | 48.8 | 62.1 | 71.4 | 78   | 82.8 | 91.1 | 95   | 97.5 |
| Women | Maintain robustness  | 73.2                         | 55.5 | 43.2 | 34.3 | 27.8 | 22.8 | 13.1 | 7.9  | 4.1  |
| Women | Maintain pre-frailty | 63.7                         | 43.5 | 31.7 | 24.3 | 19.3 | 15.8 | 9.3  | 5.8  | 3.1  |
| Women | Maintain frailty     | 66                           | 44.6 | 30.9 | 21.8 | 15.8 | 11.6 | 5.2  | 2.6  | 1.2  |
| Women | Robust → pre-frail   | 20                           | 27.5 | 29.1 | 27.8 | 25.4 | 22.7 | 15   | 9.6  | 5.2  |
| Women | Pre-frail → frail    | 13                           | 17   | 17.1 | 15.7 | 13.8 | 11.8 | 7.2  | 4.4  | 2.3  |
| Women | Pre-frail → robust   | 9.2                          | 12.7 | 13.4 | 12.9 | 11.7 | 10.5 | 6.9  | 4.4  | 2.4  |
| Women | Frail → pre-frail    | 8.3                          | 10.9 | 11   | 10   | 8.8  | 7.6  | 4.6  | 2.8  | 1.5  |
| Women | Robust → deceased    | 4.8                          | 11.6 | 19.5 | 27.8 | 35.9 | 43.5 | 62.7 | 76   | 87   |
| Women | Pre-frail → deceased | 14.1                         | 26.8 | 37.8 | 47.2 | 55.2 | 61.9 | 76.5 | 85.4 | 92.2 |
| Women | Frail → deceased     | 25.1                         | 42.9 | 55.7 | 65.1 | 72.2 | 77.5 | 87.5 | 92.7 | 96.2 |

**eTable 4 Effects of covariates on transitions among frailty states**

| Covariates           | Level                        | HR (95% CI)          |
|----------------------|------------------------------|----------------------|
|                      |                              | Death transition     |
|                      |                              | Robust → Deceased    |
| Age                  |                              |                      |
| Men                  | —                            | 1.069 (1.056, 1.081) |
| Women                | —                            | 1.081 (1.060, 1.102) |
| Education level      |                              |                      |
| Men                  | None (0)                     | 1.145 (0.910, 1.440) |
| Women                | None (0)                     | 0.837 (0.585, 1.196) |
| Residence            |                              |                      |
| Men                  | Rural                        | 1.196 (0.956, 1.496) |
| Women                | Rural                        | 1.054(0.744, 1.493)  |
| Marital status       |                              |                      |
| Men                  | Other                        | 1.351 (1.084, 1.683) |
| Women                | Other                        | 0.779 (0.549, 1.107) |
| Social participation |                              |                      |
| Men                  | No                           | 1.057 (0.681, 1.640) |
| Women                | No                           | 0.381 (0.123, 1.176) |
| Smoking status       |                              |                      |
| Men                  | Current                      | 1.316 (1.060, 1.635) |
| Women                | Current                      | 0.959 (0.586, 1.570) |
| Current drinking     |                              |                      |
| Men                  | Yes                          | 1.051 (0.857, 1.288) |
| Women                | Yes                          | 0.846 (0.503, 1.424) |
| Exercise             |                              |                      |
| Men                  | No                           | 0.996 (0.795, 1.249) |
| Women                | No                           | 1.011 (0.713, 1.434) |
| Dietary pattern      |                              |                      |
| Men                  | Intermediate/<br>Unfavorable | 0.940 (0.760, 1.162) |
| Women                | Intermediate/<br>Unfavorable | 0.962 (0.681, 1.358) |
| BMI                  |                              |                      |
| Men                  | <18.5 or ≥28<br>kg/m²        | 1.174 (0.953, 1.447) |
| Women                | <18.5 or ≥28<br>kg/m2        | 0.819 (0.582, 1.151) |

Reference of covariates: education level, ref= ever (≥1); residence, ref=city and town; marital status, ref=married; smoking status, ref=never; current drinking, ref= no; dietary pattern, ref=favorable; exercise, ref=yes; social participation, ref=yes; BMI, ref=18.5~28 kg/m<sup>2</sup>.

Boldface indicates statistical significance ( $P<0.05$ ).



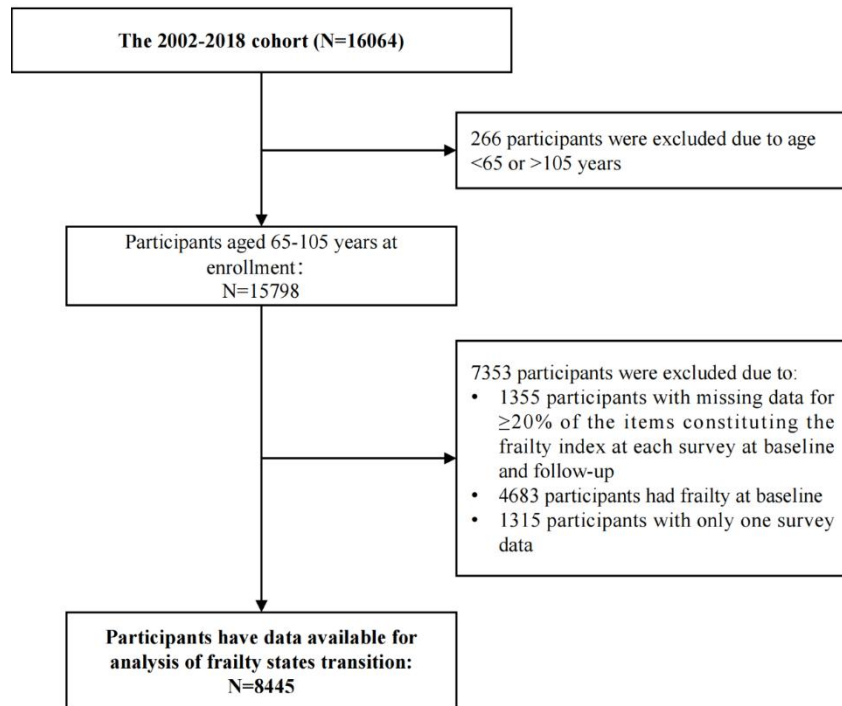

**eFigure 1 Flowchart of participants selection**

This figure illustrates the participant selection process for the study. Participants were excluded based on the following criteria: missing age information (n=266), missing frailty index data (n=1,355), being frail at baseline (n=4,683), and participation in only one survey round (n=1,315). Consequently, the final analytical sample comprised 8,445 participants.

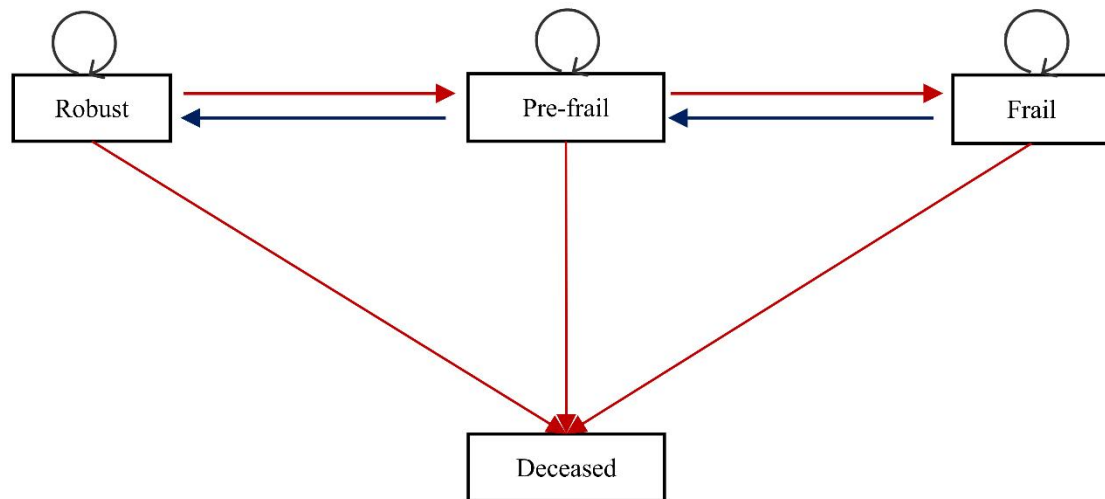

**eFigure 2 Multi-state Markov model**

This diagram shows the transitions among the robust, pre-frail, frail, and deceased states. The robust, pre-frail, and frail states are modeled as transient states, while the deceased state is considered an absorbing state in the multi-state Markov model. The arrows show which transitions are possible between states.

## **Supplementary Appendix**

### **1 eAppendix 1:**

#### **1.1 Assessment of covariate**

##### **1.1.1 Social participation**

In this study, social participation was defined as engagement in activities involving interaction with others within social or community settings. This was assessed based on responses to Chinese Longitudinal Healthy Longevity Survey (CLHLS) questionnaire items regarding "participation in outdoor activities, card games, or organized social activities during the past month" <sup>1</sup>. Responses were dichotomized into "yes" or "no" categories.

##### **1.1.2 Smoking status**

Smoking status was determined based on responses to the following CLHLS questionnaire items: "Do you currently smoke?", "Did you smoke in the past?", and "If you do not smoke now, at what age did you quit smoking?". Responses were categorized into two groups: current smoking (including smoking cessation <30 years ago) and never smoking (including smoking cessation ≥30 years ago) <sup>2</sup>.

##### **1.1.3 Current Drinking**

Current drinking status was determined based on the response to the CLHLS questionnaire item "Do you currently drink alcohol?". Responses were categorized as "yes" or "no".

##### **1.1.4 Dietary pattern**

Previous studies have shown that consumption of plant-based foods or adherence to a Mediterranean diet can reduce the risk of frailty <sup>3-7</sup>. Therefore, this study assessed dietary patterns based on the frequency of consumption of five food categories: fish, fruits, vegetables, legumes, and tea. Consumption frequency was classified into three levels: "often or almost daily" (assigned 2 points), "sometimes or occasionally"

(assigned 1 point), and "rarely or never" (assigned 0 points). The scores for the five food categories were summed to obtain a total score (range: 0–10). Based on the total score, dietary patterns were categorized into two groups: unfavorable (0–4 points) and moderate or favorable (5–10 points).

#### 1.1.5 Exercise

In this study, "exercise" was defined as purposeful physical fitness activities and was assessed based on the response to the CLHLS questionnaire item "Do you currently engage in regular purposeful exercise, such as walking or playing ball games?"<sup>8</sup>.

#### 1.1.6 BMI

BMI was calculated by dividing weight (kg) by the square of height (m). Studies have found that the relationship between BMI and risk of frailty is a U-shaped nonlinear association, with higher or lower BMI being associated with an increased risk of frailty in community-dwelling older adults.<sup>9,10</sup> Therefore, this study categorized BMI as  $<18.5$  or  $\text{BMI} \geq 28 \text{ kg/m}^2$ , and  $\geq 18.5$  to  $<28 \text{ kg/m}^2$ .

### 1.2 Multi-state Markov model

The multi-state Markov model is employed to describe the process by which individuals transition through a series of states over continuous time, under the assumption that future state changes depend only on the current state. Transition intensities are assumed to remain constant over time. The BFGS quasi-Newton optimization algorithm was used for parameter estimation<sup>11</sup>.

Figure 1 illustrates the possible transitions among the robust, pre-frail, frail, and deceased states. The four states are coded as follows: robust as 1, pre-frail as 2, frail as 3, and deceased as 4. States 1–3 are transient states, while state 4 is an absorbing state. Individuals in transient states may move between adjacent states, but no further transitions occur once the absorbing state is reached.

Assuming an individual is in state  $S(t)$  at time  $t$ , the transition between states is determined

by the transition intensity  $q_{rs}(t, z(t))$ , calculated as:

$$q_{rs}(t, z(t)) = \lim_{\delta t \rightarrow 0} P(S(t + \delta t) = s | S(t) = r) / \delta t$$

Here,  $q_{rs}$  represents the instantaneous rate of transition from state  $r$  to state  $s$ .

All  $q_{rs}$  values form the transition intensity matrix  $Q$ , defined as:

$$Q = \begin{pmatrix} -(q_{12} + q_{14}) & q_{12} & 0 & q_{14} \\ q_{21} & -(q_{21} + q_{23} + q_{24}) & q_{23} & q_{24} \\ 0 & q_{32} & -(q_{32} + q_{34}) & q_{34} \\ 0 & 0 & 0 & 0 \end{pmatrix}$$

In this matrix,  $q_{13}$  and  $q_{31}$  are set to 0, as direct transitions between robust and frail states are not considered. The term  $-(q_{12} + q_{14})$  represents the instantaneous rate of remaining in the robust state, while  $q_{12}$  denotes the instantaneous transition rate from robust to pre-frail. Since death is an absorbing state, all elements  $q_{41}$  to  $q_{44}$  are assigned a value of 0. Other elements are defined similarly. Each row of matrix  $Q$  sums to 0, so the diagonal elements are defined as  $q_{rr} = -\sum_{s \neq r} q_{rs}$

The probability that an individual in state  $r$  will transition next to state  $s$  is given by  $-q_{rs}/q_{rr}$ . The mean sojourn time represents the expected average duration an individual remains continuously in a specific state before transitioning out, calculated as  $-1/\hat{q}_{rr}$ , where  $\hat{q}_{rr}$  is the estimated  $r$ -th diagonal element of the transition intensity matrix. In this study, the estimated mean sojourn time for each transient state  $r$  was derived based on a given set of covariate values (age, education level, residential area, marital status, social participation, smoking, drinking, exercise, dietary pattern, and BMI).

A proportional intensity model was used to model the effect of explanatory variables  $\mathbf{z}_{ij}$  on transition rates. The effect of explanatory variables on the transition intensity for individual  $i$  at observation  $j$  is calculated as:

$$q_{rs}(z_{ij}) = q_{rs}^{(0)} \exp(\boldsymbol{\beta}_{rs}^T \mathbf{z}_{ij})$$

where  $q_{rs}$  denotes the baseline transition intensity from state  $r$  to state  $s$ , and  $\exp(\boldsymbol{\beta}_{rs})$  represents the hazard ratio of the covariates for the transition intensity from state  $r$  to state  $s$ .

## Reference

1. Levasseur M, Lussier-Therrien M, Biron ML, et al. Scoping study of definitions of social participation: update and co-construction of an interdisciplinary consensual definition. *Age and ageing*. 2022;51(2).
2. Yang J, Huang J, Huang Q, et al. The Impact of Social Stress and Healthy Lifestyle on the Mortality of Chinese Older Adults: Prospective Cohort Study. *JMIR aging*. 2025;8:e75942.
3. Ghoreishy SM, Asoudeh F, Jayedi A, Mohammadi H. Fruit and vegetable intake and risk of frailty: A systematic review and dose response meta-analysis. *Ageing research reviews*. 2021;71:101460.
4. Sotos-Prieto M, Struijk EA, Fung TT, et al. Association between the quality of plant-based diets and risk of frailty. *Journal of cachexia, sarcopenia and muscle*. 2022;13(6):2854-2862.
5. Jayanama K, Theou O, Godin J, et al. Relationship between diet quality scores and the risk of frailty and mortality in adults across a wide age spectrum. *BMC medicine*. 2021;19(1):64.
6. Ntanasi E, Charisis S, Yannakoulia M, et al. Adherence to the Mediterranean diet and incident frailty: Results from a longitudinal study. *Maturitas*. 2022;162:44-51.
7. Kojima G, Avgerinou C, Iliffe S, Walters K. Adherence to Mediterranean Diet Reduces Incident Frailty Risk: Systematic Review and Meta-Analysis. *Journal of the American Geriatrics Society*. 2018;66(4):783-788.
8. Dai L, Tang Y, Guo Y, Lai X, Wang X, Li B. The association between exercise, activities, and frailty in older Chinese adults: a cross-sectional study based on the Chinese Longitudinal Healthy Longevity Survey (CLHLS) data. *BMC geriatrics*. 2025;25(1):131.
9. Yuan L, Chang M, Wang J. Abdominal obesity, body mass index and the risk of frailty in community-dwelling older adults: a systematic review and meta-analysis. *Age and ageing*. 2021;50(4):1118-1128.
10. Fan J, Yu C, Pang Y, et al. Adherence to Healthy Lifestyle and Attenuation of Biological Aging in Middle-Aged and Older Chinese Adults. *The journals of gerontology Series A, Biological sciences and medical sciences*. 2021;76(12):2232-2241.
11. Jackson C. Multi-state models for panel data: the msm package for R. *Journal of statistical software*. 2011;38:1-28.
